# Supplementary material for: Downregulation of PPARα during Experimental Left Ventricular Hypertrophy is Critically Dependent on Nox2 NADPH Oxidase Signalling
Source: PubMed Central journal article supplement (PMC7352162; doi:10.3390/ijms21124406), 2020-06-20
Supplement: ijms-21-04406-s001.pdf [file ijms-21-04406-s001.pdf]

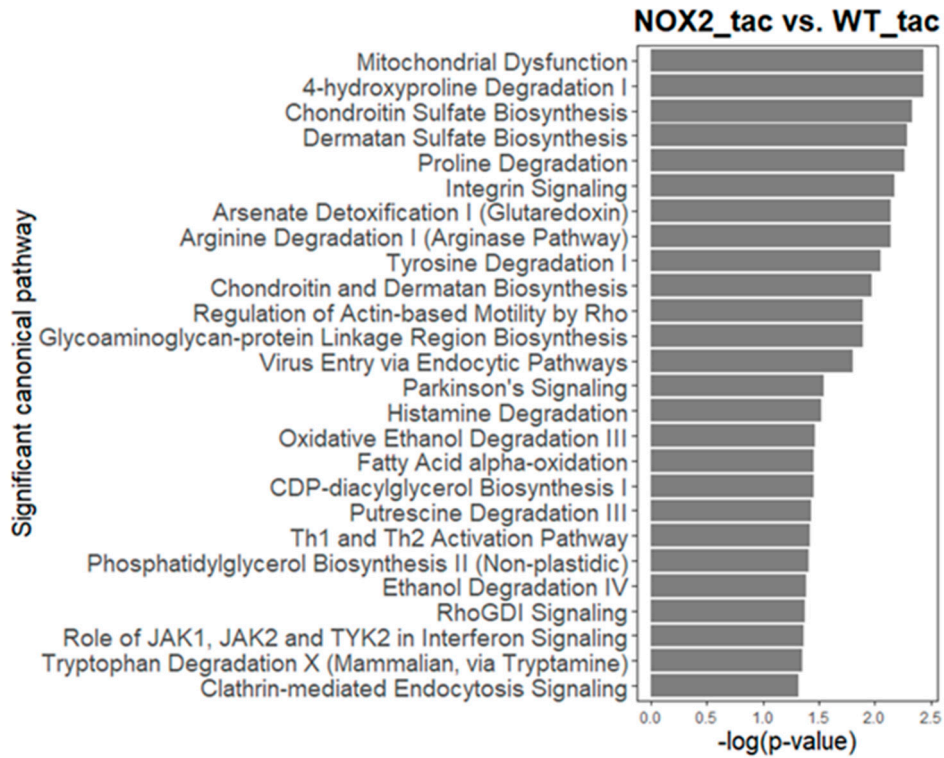

**Supplementary Figure 1. Canonical pathway analysis of differentially expressed genes using IPA.** Significantly enriched pathways in Nox2<sup>-/-</sup> TAC vs WT TAC mice (grey indicates that no activation z-score could be predicted by IPA). N=3-4.

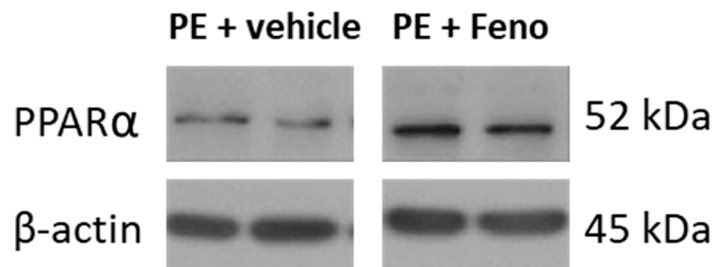

**Supplementary Figure 2. Fenofibrate treatment activates PPAR in H9c2 cardiomyocytes.** Cells were incubated with vehicle or the PPAR $\alpha$  agonist fenofibrate (10 $\mu$ mol/L) prior to PE treatment for 24h and PPAR $\alpha$  protein expression analysis by western blot.
